# Supplementary material for: Wnt4 is not sufficient to induce lobuloalveolar mammary development
Source: PubMed Central journal article supplement (PMC2777140; doi:10.1186/1471-213x-9-55), 2009-10-30
Supplement: 1471-213X-9-55-S2.pdf [file 1471-213X-9-55-S2.pdf]

| Symbol   | Well | AVG $\Delta C_t$<br>(Ct(GOI) - Ave Ct<br>(HKG)) |            | $2^{-\Delta C_t}$ |            | Fold Difference  | T-TEST        | Fold Up- or Down-<br>Regulation |
|----------|------|-------------------------------------------------|------------|-------------------|------------|------------------|---------------|---------------------------------|
|          |      | Wnt4                                            | Virgin Con | Wnt4              | Virgin Con | Wnt4 /Virgin Con | p value       | Wnt4 /Virgin Con                |
| Aes      | A01  | 1.26                                            | 1.49       | 4.2E-01           | 3.6E-01    | 1.18             | 0.0647        | 1.18                            |
| Apc      | A02  | 3.04                                            | 3.62       | 1.2E-01           | 8.2E-02    | 1.49             | <b>0.0078</b> | 1.49                            |
| Axin1    | A03  | 6.09                                            | 6.35       | 1.5E-02           | 1.2E-02    | 1.19             | <b>0.0044</b> | 1.19                            |
| Bcl9     | A04  | 5.85                                            | 6.12       | 1.7E-02           | 1.4E-02    | 1.21             | 0.0770        | 1.21                            |
| Btrc     | A05  | 5.13                                            | 5.50       | 2.9E-02           | 2.2E-02    | 1.29             | <b>0.0007</b> | 1.29                            |
| Ctnnbip1 | A06  | 7.60                                            | 7.83       | 5.2E-03           | 4.4E-03    | 1.18             | 0.3202        | 1.18                            |
| Ccnd1    | A07  | 4.16                                            | 3.55       | 5.6E-02           | 8.5E-02    | 0.66             | 0.3583        | -1.52                           |
| Ccnd2    | A08  | 1.67                                            | 1.31       | 3.1E-01           | 4.0E-01    | 0.78             | <b>0.0022</b> | -1.29                           |
| Ccnd3    | A09  | 3.00                                            | 2.73       | 1.3E-01           | 1.5E-01    | 0.83             | 0.1889        | -1.20                           |
| Csnk1a1  | A10  | 1.02                                            | 3.27       | 4.9E-01           | 1.0E-01    | <b>4.74</b>      | 0.2532        | <b>4.74</b>                     |
| Csnk1d   | A11  | 4.39                                            | 4.66       | 4.8E-02           | 3.9E-02    | 1.21             | <b>0.0122</b> | 1.21                            |
| Csnk2a1  | A12  | 3.74                                            | 3.96       | 7.5E-02           | 6.4E-02    | 1.17             | 0.0924        | 1.17                            |
| Ctbp1    | B01  | 3.31                                            | 3.47       | 1.0E-01           | 9.0E-02    | 1.12             | 0.1039        | 1.12                            |
| Ctbp2    | B02  | 4.05                                            | 4.08       | 6.0E-02           | 5.9E-02    | 1.02             | 0.8985        | 1.02                            |
| Ctnnb1   | B03  | 2.00                                            | 1.89       | 2.5E-01           | 2.7E-01    | 0.92             | 0.4708        | -1.08                           |
| Daam1    | B04  | 3.70                                            | 4.04       | 7.7E-02           | 6.1E-02    | 1.26             | <b>0.0125</b> | 1.26                            |
| Dixdc1   | B05  | 4.98                                            | 6.04       | 3.2E-02           | 1.5E-02    | <b>2.09</b>      | <b>0.0163</b> | <b>2.09</b>                     |
| Dkk1     | B06  | 16.22                                           | 16.20      | 1.3E-05           | 1.3E-05    | 0.99             | 0.9856        | -1.01                           |
| Dvl1     | B07  | 14.48                                           | 15.27      | 4.4E-05           | 2.5E-05    | 1.73             | 0.2168        | 1.73                            |
| Dvl2     | B08  | 6.25                                            | 6.77       | 1.3E-02           | 9.2E-03    | 1.43             | <b>0.0497</b> | 1.43                            |
| Ep300    | B09  | 6.21                                            | 6.92       | 1.4E-02           | 8.3E-03    | 1.64             | <b>0.0040</b> | 1.64                            |
| Fbxw11   | B10  | 4.40                                            | 4.01       | 4.7E-02           | 6.2E-02    | 0.76             | 0.1100        | -1.31                           |
| Fbxw2    | B11  | 3.31                                            | 3.42       | 1.0E-01           | 9.4E-02    | 1.08             | 0.4405        | 1.08                            |
| Fbxw4    | B12  | 4.48                                            | 5.30       | 4.5E-02           | 2.5E-02    | 1.77             | <b>0.0002</b> | 1.77                            |
| Fgf4     | C01  | 12.55                                           | 12.96      | 1.7E-04           | 1.3E-04    | 1.33             | 0.4789        | 1.33                            |
| Fosl1    | C02  | 10.16                                           | 11.06      | 8.7E-04           | 4.7E-04    | 1.86             | <b>0.0045</b> | 1.86                            |
| Foxn1    | C03  | 16.54                                           | 17.76      | 1.1E-05           | 4.5E-06    | <b>2.34</b>      | <b>0.0002</b> | <b>2.34</b>                     |
| Frat1    | C04  | 7.62                                            | 8.27       | 5.1E-03           | 3.2E-03    | 1.57             | <b>0.0200</b> | 1.57                            |
| Frzb     | C05  | 14.92                                           | 16.54      | 3.2E-05           | 1.1E-05    | <b>3.06</b>      | 0.1606        | <b>3.06</b>                     |
| Fshb     | C06  | 16.54                                           | 17.69      | 1.1E-05           | 4.7E-06    | <b>2.22</b>      | <b>0.0010</b> | <b>2.22</b>                     |
| Fzd1     | C07  | 4.31                                            | 4.22       | 5.0E-02           | 5.4E-02    | 0.94             | 0.6698        | -1.07                           |
| Fzd2     | C08  | 6.96                                            | 6.79       | 8.0E-03           | 9.0E-03    | 0.89             | 0.3883        | -1.13                           |
| Fzd3     | C09  | 5.39                                            | 5.99       | 2.4E-02           | 1.6E-02    | 1.52             | <b>0.0377</b> | 1.52                            |
| Fzd4     | C10  | 1.48                                            | 1.78       | 3.6E-01           | 2.9E-01    | 1.23             | 0.2521        | 1.23                            |
| Fzd5     | C11  | 7.29                                            | 8.12       | 6.4E-03           | 3.6E-03    | 1.78             | <b>0.0105</b> | 1.78                            |
| Fzd6     | C12  | 5.46                                            | 5.81       | 2.3E-02           | 1.8E-02    | 1.28             | <b>0.0484</b> | 1.28                            |
| Fzd7     | D01  | 6.08                                            | 6.79       | 1.5E-02           | 9.0E-03    | 1.64             | <b>0.0049</b> | 1.64                            |
| Fzd8     | D02  | 14.33                                           | 14.86      | 4.9E-05           | 3.4E-05    | 1.45             | 0.1722        | 1.45                            |
| Gsk3b    | D03  | 2.33                                            | 2.50       | 2.0E-01           | 1.8E-01    | 1.12             | 0.2376        | 1.12                            |
| Jun      | D04  | 3.36                                            | 4.11       | 9.7E-02           | 5.8E-02    | 1.67             | <b>0.0263</b> | 1.67                            |
| Kremen1  | D05  | 4.91                                            | 5.50       | 3.3E-02           | 2.2E-02    | 1.50             | <b>0.0014</b> | 1.50                            |
| Lef1     | D06  | 11.76                                           | 12.82      | 2.9E-04           | 1.4E-04    | <b>2.08</b>      | <b>0.0028</b> | <b>2.08</b>                     |
| Lrp5     | D07  | 4.12                                            | 5.10       | 5.7E-02           | 2.9E-02    | 1.97             | <b>0.0000</b> | 1.97                            |
| Lrp6     | D08  | 2.30                                            | 2.90       | 2.0E-01           | 1.3E-01    | 1.52             | <b>0.0101</b> | 1.52                            |
| Myc      | D09  | 3.15                                            | 3.36       | 1.1E-01           | 9.8E-02    | 1.16             | 0.6769        | 1.16                            |
| Nkd1     | D10  | 7.78                                            | 8.06       | 4.5E-03           | 3.8E-03    | 1.21             | 0.7985        | 1.21                            |
| Nlk      | D11  | 5.00                                            | 5.22       | 3.1E-02           | 2.7E-02    | 1.17             | 0.1381        | 1.17                            |
| Pitx2    | D12  | 12.47                                           | 16.63      | 1.8E-04           | 9.9E-06    | <b>17.88</b>     | 0.1278        | <b>17.88</b>                    |
| Porcn    | E01  | 6.43                                            | 6.51       | 1.2E-02           | 1.1E-02    | 1.06             | 0.3655        | 1.06                            |
| Ppp2ca   | E02  | 1.11                                            | 0.96       | 4.6E-01           | 5.1E-01    | 0.90             | 0.3938        | -1.11                           |
| Ppp2r1a  | E03  | 3.08                                            | 2.89       | 1.2E-01           | 1.3E-01    | 0.88             | 0.1383        | -1.14                           |
| Ppp2r5d  | E04  | 4.28                                            | 4.26       | 5.2E-02           | 5.2E-02    | 0.99             | 0.9009        | -1.01                           |
| Pygo1    | E05  | 6.18                                            | 6.63       | 1.4E-02           | 1.0E-02    | 1.37             | <b>0.0088</b> | 1.37                            |
| Rhou     | E06  | 4.30                                            | 5.01       | 5.1E-02           | 3.1E-02    | 1.63             | <b>0.0036</b> | 1.63                            |
| Senp2    | E07  | 4.34                                            | 4.66       | 4.9E-02           | 4.0E-02    | 1.24             | <b>0.0077</b> | 1.24                            |
| Sfrp1    | E08  | 4.82                                            | 5.32       | 3.5E-02           | 2.5E-02    | 1.42             | 0.0758        | 1.42                            |
| Sfrp2    | E09  | 5.25                                            | 5.36       | 2.6E-02           | 2.4E-02    | 1.08             | 0.6375        | 1.08                            |
| Sfrp4    | E10  | 6.55                                            | 4.04       | 1.1E-02           | 6.1E-02    | <b>0.17</b>      | <b>0.0021</b> | <b>-5.72</b>                    |
| Slc9a3r1 | E11  | 5.47                                            | 5.36       | 2.3E-02           | 2.4E-02    | 0.93             | 0.7985        | -1.08                           |
| Sox17    | E12  | 7.55                                            | 8.15       | 5.4E-03           | 3.5E-03    | 1.52             | <b>0.0139</b> | 1.52                            |
| T        | F01  | 16.54                                           | 17.09      | 1.1E-05           | 7.2E-06    | 1.47             | 0.4443        | 1.47                            |
| Tcf3     | F02  | 9.00                                            | 9.09       | 2.0E-03           | 1.8E-03    | 1.07             | 0.7223        | 1.07                            |
| Tcf7     | F03  | 8.87                                            | 8.33       | 2.1E-03           | 3.1E-03    | 0.69             | 0.3681        | -1.46                           |
| Tle1     | F04  | 5.35                                            | 5.77       | 2.4E-02           | 1.8E-02    | 1.33             | <b>0.0190</b> | 1.33                            |
| Tle2     | F05  | 5.46                                            | 7.68       | 2.3E-02           | 4.9E-03    | <b>4.67</b>      | <b>0.0328</b> | <b>4.67</b>                     |

This is another way to present the fold change.  
If the fold change is positive, it means up-regulation.  
If the fold change is negative, it means down-regulation.

|          |     |       |       |         |         |              |               |              |
|----------|-----|-------|-------|---------|---------|--------------|---------------|--------------|
| Wif1     | F06 | 7.03  | 6.73  | 7.7E-03 | 9.4E-03 | 0.81         | 0.6869        | -1.23        |
| Wisp1    | F07 | 9.97  | 11.12 | 1.0E-03 | 4.5E-04 | <b>2.22</b>  | <b>0.0295</b> | <b>2.22</b>  |
| Wnt1     | F08 | 13.56 | 11.57 | 8.3E-05 | 3.3E-04 | <b>0.25</b>  | 0.1186        | <b>-3.95</b> |
| Wnt10a   | F09 | 11.95 | 10.58 | 2.5E-04 | 6.5E-04 | 0.39         | 0.0952        | <b>-2.57</b> |
| Wnt11    | F10 | 7.41  | 7.15  | 5.9E-03 | 7.0E-03 | 0.84         | 0.2085        | -1.19        |
| Wnt16    | F11 | 7.44  | 13.23 | 5.8E-03 | 1.0E-04 | <b>55.41</b> | <b>0.0000</b> | <b>55.41</b> |
| Wnt2     | F12 | 8.79  | 7.49  | 2.3E-03 | 5.6E-03 | 0.41         | <b>0.0000</b> | <b>-2.46</b> |
| Wnt2b    | G01 | 13.96 | 13.07 | 6.3E-05 | 1.2E-04 | 0.54         | 0.3556        | -1.86        |
| Wnt3     | G02 | 16.54 | 17.49 | 1.1E-05 | 5.4E-06 | 1.94         | <b>0.0284</b> | 1.94         |
| Wnt3a    | G03 | 16.54 | 17.76 | 1.1E-05 | 4.5E-06 | <b>2.34</b>  | <b>0.0002</b> | <b>2.34</b>  |
| Wnt4     | G04 | 2.67  | 8.33  | 1.6E-01 | 3.1E-03 | <b>50.72</b> | <b>0.0001</b> | <b>50.72</b> |
| Wnt5a    | G05 | 7.46  | 7.53  | 5.7E-03 | 5.4E-03 | 1.05         | 0.7277        | 1.05         |
| Wnt5b    | G06 | 4.94  | 6.59  | 3.3E-02 | 1.0E-02 | <b>3.14</b>  | <b>0.0002</b> | <b>3.14</b>  |
| Wnt6     | G07 | 10.63 | 10.52 | 6.3E-04 | 6.8E-04 | 0.93         | 0.8174        | -1.07        |
| Wnt7a    | G08 | 16.54 | 17.76 | 1.1E-05 | 4.5E-06 | <b>2.34</b>  | <b>0.0002</b> | <b>2.34</b>  |
| Wnt7b    | G09 | 9.55  | 9.83  | 1.3E-03 | 1.1E-03 | 1.21         | <b>0.0396</b> | 1.21         |
| Wnt8a    | G10 | 16.54 | 16.60 | 1.1E-05 | 1.0E-05 | 1.04         | 0.9143        | 1.04         |
| Wnt8b    | G11 | 14.98 | 14.78 | 3.1E-05 | 3.6E-05 | 0.87         | 0.8059        | -1.15        |
| Wnt9a    | G12 | 9.87  | 10.65 | 1.1E-03 | 6.2E-04 | 1.72         | <b>0.0467</b> | 1.72         |
| Gusb     | H01 | 4.25  | 3.94  | 5.2E-02 | 6.5E-02 | 0.80         | 0.0993        | -1.24        |
| Hprt1    | H02 | 0.64  | 0.77  | 6.4E-01 | 5.9E-01 | 1.09         | 0.3994        | 1.09         |
| Hsp90ab1 | H03 | -1.30 | -0.79 | 2.5E+00 | 1.7E+00 | 1.43         | <b>0.0002</b> | 1.43         |
| Gapdh    | H04 | -2.35 | -1.55 | 5.1E+00 | 2.9E+00 | 1.74         | 0.0776        | 1.74         |
| Actb     | H05 | -1.24 | -2.37 | 2.4E+00 | 5.2E+00 | 0.46         | <b>0.0000</b> | <b>-2.19</b> |
|          |     |       |       |         |         |              |               |              |
|          |     |       |       |         |         |              |               |              |
| Axin2    | H08 | 2.86  | 3.71  | 1.4E-01 | 7.6E-02 | 1.80         | 0.1045        | 1.80         |
| Fzd9     | H09 | 11.43 | 14.55 | 3.6E-04 | 4.2E-05 | <b>8.70</b>  | <b>0.0155</b> | <b>8.70</b>  |
| Fzd10    | H10 | 10.78 | 10.17 | 5.7E-04 | 8.7E-04 | 0.65         | 0.1863        | -1.53        |
